# Supplementary material for: The Impact of COVID-19 on the Profile of Hospital-Acquired Infections in Adult Intensive Care Units
Source: MDPI journal article supplement (doi:10.3390/antibiotics10101146), 2021-09-23
Supplement: s1 [file s1]

## Supplementary Table S1

Absolute numbers of resistance rates for individual antibiotics and overall resistance for each major antimicrobial group for each year of follow-up

| Year 1                                        | % resistance | R (n)      | Total tested |
|-----------------------------------------------|--------------|------------|--------------|
| <b>Penicillins</b>                            |              |            |              |
| Met/OXA                                       | 93.3%        | 14         | 15           |
| AMP/AMX                                       | 82.6%        | 38         | 46           |
| AMX-CL                                        | 71.1%        | 27         | 38           |
| PIP-TZ                                        | 75.4%        | 43         | 57           |
| <b>Total</b>                                  | <b>78.2%</b> | <b>122</b> | <b>156</b>   |
| <b>Cephalosporins</b>                         |              |            |              |
| Ceftriaxone                                   | <b>90.1%</b> | <b>64</b>  | <b>71</b>    |
| <b>Aminoglycosides</b>                        |              |            |              |
| Gentamicin                                    | 84.4%        | 76         | 90           |
| Amikacin                                      | 72.9%        | 51         | 70           |
| <b>Total</b>                                  | <b>79.4%</b> | <b>127</b> | <b>160</b>   |
| <b>Fluoroquinolones</b>                       |              |            |              |
| Ciprofloxacin                                 | 90.7%        | 78         | 86           |
| Levofloxacin                                  | 84.6%        | 88         | 104          |
| <b>Total</b>                                  | <b>87.4%</b> | <b>166</b> | <b>190</b>   |
| <b>Carbapenems***</b><br>(Imipenem/Meropenem) | <b>56.3%</b> | <b>49</b>  | <b>87</b>    |
| <b>Vancomycin</b>                             | <b>32.5%</b> | <b>13</b>  | <b>40</b>    |

R, number of results indicating resistance; n, number of cases; MET, methicillin; OXA, oxacillin; AMP, ampicillin; AMX, amoxicillin; AMX-CL, amoxicillin-clavulanic acid; PIP-TAZ, piperacillin-tazobactam; TMP-SMX, trimethoprim-sulfamethoxazole. N/A, no results available;

**\*\*\*In Years 1 & 2, carbapenem resistance was identified as resistance to either Imipenem or Meropenem**

| <b>Year 2</b>                              | <b>% resistance</b> | <b>R (n)</b> | <b>Total tested</b> |
|--------------------------------------------|---------------------|--------------|---------------------|
| <b>Penicillins</b>                         |                     |              |                     |
| Met/OXA                                    | 90.0%               | 9            | 10                  |
| AMP/AMX                                    | 63.0%               | 17           | 27                  |
| AMX-CL                                     | 52.0%               | 13           | 25                  |
| PIP-TZ                                     | 85.7%               | 18           | 21                  |
| <b>Total</b>                               | <b>68.7%</b>        | <b>57</b>    | <b>83</b>           |
| <b>Cephalosporins</b>                      |                     |              |                     |
| Ceftriaxone                                | 86.7%               | 26           | 30                  |
| <b>Aminoglycosides</b>                     |                     |              |                     |
| Gentamicin                                 | 90.2%               | 46           | 51                  |
| Amikacin                                   | 86.4%               | 38           | 44                  |
| <b>Total</b>                               | <b>88.4%</b>        | <b>84</b>    | <b>95</b>           |
| <b>Fluoroquinolones</b>                    |                     |              |                     |
| Ciprofloxacin                              | 94.4%               | 51           | 54                  |
| Levofloxacin                               | 89.3%               | 50           | 56                  |
| <b>Total</b>                               | <b>92.7%</b>        | <b>101</b>   | <b>109</b>          |
| <b>Carbapenems</b><br>(Imipenem/Meropenem) | <b>66.7%</b>        | <b>36</b>    | <b>54</b>           |
| <b>Vancomycin</b>                          | <b>33.3%</b>        | <b>8</b>     | <b>24</b>           |

R, number of results indicating resistance; n, number of cases; MET, methicillin; OXA, oxacillin; AMP, ampicillin; AMX, amoxicillin; AMX-CL, amoxicillin-clavulanic acid; PIP-TAZ, piperacillin-tazobactam; TMP-SMX, trimethoprim-sulfamethoxazole. N/A, no results available;

**\*\*\*In Years 1 & 2, carbapenem resistance was identified as resistance to either Imipenem or Meropenem**

| <b>Year 3</b>           | <b>% resistance</b> | <b>R (n)</b> | <b>Total tested</b> |
|-------------------------|---------------------|--------------|---------------------|
| <b>Penicillins</b>      |                     |              |                     |
| Met/OXA                 | 80.0%               | 8            | 10                  |
| AMP/AMX                 | 79.3%               | 23           | 29                  |
| AMX-CL                  | 69.6%               | 16           | 23                  |
| PIP-TZ                  | 83.3%               | 20           | 24                  |
| <b>Total</b>            | <b>77.9%</b>        | <b>67</b>    | <b>86</b>           |
| <b>Cephalosporins</b>   |                     |              |                     |
| Cefalexin               | 94.1%               | 16           | 17                  |
| Cefotaxime              | 95.2%               | 20           | 21                  |
| Ceftriaxone             | 93.1%               | 27           | 29                  |
| Ceftazidime             | 94.4%               | 34           | 36                  |
| <b>Total</b>            | <b>94.2%</b>        | <b>97</b>    | <b>103</b>          |
| <b>Aminoglycosides</b>  |                     |              |                     |
| Gentamicin              | 86.7%               | 52           | 60                  |
| Amikacin                | 75.6%               | 34           | 45                  |
| <b>Total</b>            | <b>81.9%</b>        | <b>86</b>    | <b>105</b>          |
| <b>Fluoroquinolones</b> |                     |              |                     |
| Ciprofloxacin           | 91.9%               | 57           | 62                  |
| Levofloxacin            | 94.3%               | 50           | 53                  |
| Moxifloxacin            | 89.5%               | 17           | 19                  |
| Norfloxacin             | 100.0%              | 5            | 5                   |
| <b>Total</b>            | <b>92.8%</b>        | <b>129</b>   | <b>139</b>          |
| <b>Carbapenems</b>      |                     |              |                     |
| Imipenem                | 58.3%               | 28           | 48                  |
| Meropenem               | 65.9%               | 29           | 44                  |
| <b>Total</b>            | <b>62.0%</b>        | <b>57</b>    | <b>92</b>           |
| Vancomycin              | 29.2%               | 7            | 24                  |

R, number of results indicating resistance; n, number of cases; MET, methicillin; OXA, oxacillin; AMP, ampicillin; AMX, amoxicillin; AMX-CL, amoxicillin-clavulanic acid; PIP-TAZ, piperacillin-tazobactam; TMP-SMX, trimethoprim-sulfamethoxazole. N/A, no results available;

| <b>Year 4 Total</b>     | <b>% resistance</b> | <b>R (n)</b> | <b>Total tested</b> |
|-------------------------|---------------------|--------------|---------------------|
| <b>Penicillins</b>      |                     |              |                     |
| Met/OXA                 | 96.6%               | 28           | 29                  |
| AMP/AMX                 | 81.5%               | 22           | 27                  |
| AMX-CL                  | 82.4%               | 14           | 17                  |
| PIP-TZ                  | 94.1%               | 16           | 17                  |
| <b>Total</b>            | <b>88.9%</b>        | <b>80</b>    | <b>90</b>           |
| <b>Cephalosporins</b>   |                     |              |                     |
| Cefalexin               | 100.0%              | 7            | 7                   |
| Cefotaxime              | 100.0%              | 6            | 6                   |
| Ceftriaxone             | 100.0%              | 17           | 17                  |
| Ceftazidime             | 83.3%               | 20           | 24                  |
| <b>Total</b>            | <b>92.6%</b>        | <b>50</b>    | <b>54</b>           |
| <b>Aminoglycosides</b>  |                     |              |                     |
| Gentamicin              | 94.3%               | 100          | 106                 |
| Amikacin                | 82.7%               | 81           | 98                  |
| <b>Total</b>            | <b>88.7%</b>        | <b>181</b>   | <b>204</b>          |
| <b>Fluoroquinolones</b> |                     |              |                     |
| Ciprofloxacin           | 99.1%               | 105          | 106                 |
| Levofloxacin            | 99.0%               | 102          | 103                 |
| Moxifloxacin            | 100.0%              | 17           | 17                  |
| Norfloxacin             | 100.0%              | 1            | 1                   |
| <b>Total</b>            | <b>99.1%</b>        | <b>225</b>   | <b>227</b>          |
| <b>Carbapenems</b>      |                     |              |                     |
| Imipenem                | 93.4%               | 85           | 91                  |
| Meropenem               | 94.0%               | 94           | 100                 |
| <b>Total</b>            | <b>93.7%</b>        | <b>179</b>   | <b>191</b>          |
| Vancomycin              | 31.7%               | 13           | 41                  |

R, number of results indicating resistance; n, number of cases; MET, methicillin; OXA, oxacillin; AMP, ampicillin; AMX, amoxicillin; AMX-CL, amoxicillin-clavulanic acid; PIP-TAZ, piperacillin-tazobactam; TMP-SMX, trimethoprim-sulfamethoxazole. N/A, no results available;

**Supplementary Table S2** Absolute numbers of pathogen distribution and resistance rates of most frequently identified pathogens over four years of follow-up

| <i>Acinetobacter spp.</i> | AMN |     |      | FQ  |     |      | CBP |     |      |
|---------------------------|-----|-----|------|-----|-----|------|-----|-----|------|
|                           | n   | R   | %    | n   | R   | %    | n   | R   | T    |
| Year 1                    | 18  | 17  | 94%  | 24  | 23  | 96%  | 19  | 19  | 100% |
| Year 2                    | 16  | 16  | 100% | 22  | 21  | 95%  | 14  | 14  | 100% |
| Year 3                    | 24  | 23  | 96%  | 24  | 24  | 100% | 25  | 24  | 96%  |
| Year 4<br>(COVID-19)      | 106 | 106 | 100% | 106 | 106 | 100% | 115 | 115 | 100% |

n, number of tested antibiotics; R, number of resistant pathogens; AMN, aminoglycosides; FQ, fluoroquinolones; CBP, carbapenems;

| <i>Klebsiella spp.</i> | PCN |    |     | CEP |    |     | AMN |    |     | FQ |    |      | CBP |    |     | COL |   |     |
|------------------------|-----|----|-----|-----|----|-----|-----|----|-----|----|----|------|-----|----|-----|-----|---|-----|
|                        | n   | R  | %   | n   | R  | %   | n   | R  | %   | n  | R  | %    | n   | R  | %   | n   | r | %   |
| Year 1                 | 37  | 35 | 95% | 21  | 20 | 95% | 28  | 18 | 64% | 34 | 22 | 65%  | 21  | 7  | 33% | 8   | 1 | 13% |
| Year 2                 | 14  | 13 | 93% | 13  | 12 | 92% | 13  | 10 | 77% | 20 | 16 | 80%  | 12  | 7  | 58% | 10  | 4 | 40% |
| Year 3                 | 12  | 11 | 92% | 22  | 20 | 91% | 12  | 9  | 75% | 15 | 13 | 87%  | 18  | 12 | 67% | 4   | 2 | 50% |
| Year 4<br>(COVID-19)   | 12  | 10 | 83% | 10  | 8  | 80% | 12  | 6  | 50% | 12 | 12 | 100% | 24  | 20 | 83% | 7   | 1 | 14% |

n, number of tested antibiotics; R, number of resistant pathogens; PCN, penicillins; CEP, cephalosporins; AMN, aminoglycosides; FQ, fluoroquinolones; CBP, carbapenems; COL, colistin;

| <i>Enterococcus spp.</i> | PCN |    |     | AMN |    |      | FQ |    |      | CBP |   |     | VAN |    |     |
|--------------------------|-----|----|-----|-----|----|------|----|----|------|-----|---|-----|-----|----|-----|
|                          | n   | R  | %   | n   | R  | %    | n  | R  | %    | n   | R | %   | n   | r  | %   |
| Year 1                   | 37  | 17 | 46% | 14  | 12 | 86%  | 33 | 32 | 97%  | 6   | 2 | 33% | 18  | 12 | 67% |
| Year 2                   | 31  | 14 | 45% | 25  | 25 | 100% | 21 | 21 | 100% | 12  | 4 | 33% | 14  | 8  | 57% |
| Year 3                   | 27  | 14 | 52% | 12  | 9  | 75%  | 21 | 19 | 90%  | 8   | 4 | 50% | 12  | 7  | 58% |
| Year 4<br>(COVID-19)     | 25  | 20 | 80% | 11  | 10 | 91%  | 6  | 6  | 100% | 10  | 8 | 80% | 15  | 11 | 73% |

n, number of tested antibiotics; R, number of resistant pathogens; PCN, penicillins; AMN, aminoglycosides; FQ, fluoroquinolones; CBP, carbapenems; VAN, vancomycin

| <i>P. aeruginosa</i> | PCN |    |      | CEP |    |      | AMN |    |     | FQ |    |      | CBP |    |      | COL |   |    |
|----------------------|-----|----|------|-----|----|------|-----|----|-----|----|----|------|-----|----|------|-----|---|----|
|                      | n   | R  | %    | n   | R  | %    | n   | R  | %   | n  | R  | %    | n   | R  | %    | n   | r | %  |
| Year 1               | 21  | 13 | 62%  | 16  | 14 | 88%  | 39  | 33 | 85% | 39 | 37 | 95%  | 19  | 14 | 74%  | 13  | 0 | 0% |
| Year 2               | 9   | 8  | 89%  | 7   | 6  | 86%  | 14  | 12 | 86% | 14 | 14 | 100% | 7   | 7  | 100% | 5   | 0 | 0% |
| Year 3               | 8   | 8  | 100% | 7   | 7  | 100% | 15  | 14 | 93% | 15 | 15 | 100% | 16  | 14 | 88%  | 8   | 0 | 0% |
| Year 4<br>(COVID-19) | 12  | 12 | 100% | 12  | 11 | 92%  | 19  | 9  | 47% | 24 | 22 | 92%  | 22  | 20 | 91%  | 12  | 0 | 0% |

n, number of tested antibiotics; R, number of resistant pathogens; PCN, penicillins; CEP, cephalosporins; AMN, aminoglycosides; FQ, fluoroquinolones; CBP, carbapenems; COL, colistin;

Supplementary Table S3 Serbian National guidelines for COVID-19 Treatment, Version 11.  
(Translated from Serbian to English and the original Serbian Version)

| Protocol for the treatment of COVID-19 patients                                                                                                                                                                                                                                                                                                                                                                                     |                                                                                                                                                                                                                                                                                                                 |                                                                                                                                                                                                                                                                                                                                                                                                                                                                                                                                                                                                                                                                                                  |
|-------------------------------------------------------------------------------------------------------------------------------------------------------------------------------------------------------------------------------------------------------------------------------------------------------------------------------------------------------------------------------------------------------------------------------------|-----------------------------------------------------------------------------------------------------------------------------------------------------------------------------------------------------------------------------------------------------------------------------------------------------------------|--------------------------------------------------------------------------------------------------------------------------------------------------------------------------------------------------------------------------------------------------------------------------------------------------------------------------------------------------------------------------------------------------------------------------------------------------------------------------------------------------------------------------------------------------------------------------------------------------------------------------------------------------------------------------------------------------|
| Version 11                                                                                                                                                                                                                                                                                                                                                                                                                          |                                                                                                                                                                                                                                                                                                                 |                                                                                                                                                                                                                                                                                                                                                                                                                                                                                                                                                                                                                                                                                                  |
| Form of the disease                                                                                                                                                                                                                                                                                                                                                                                                                 | Institution                                                                                                                                                                                                                                                                                                     | Treatment                                                                                                                                                                                                                                                                                                                                                                                                                                                                                                                                                                                                                                                                                        |
| <p><b>FORM 1</b></p> <ol style="list-style-type: none"> <li>1. <b>Positive nasopharyngeal swab</b> (PCR for SARS-CoV-2, Ag test)</li> <li>2. <b>Asymptomatic</b></li> <li>3. <b>Very mild clinical presentation</b></li> <li>4. <b>Patients without comorbidities</b> and with the mild form of the infection (hospitalized patients with <math>sO_2 &gt; 94\%</math> and <b>without signs of pneumonia on X-ray</b>)</li> </ol>    | <p><b>At-home treatment and home isolation</b> with monitoring and follow-up by <b>Covid clinic staff</b></p>                                                                                                                                                                                                   | <p><b>Vitamin therapy:</b> alphacalcidol tablets (<b>Alpha D3</b>), 1x2 mcg, <b>vitamin C</b> 1x 1g (if there are no kidney issues)</p> <p><i><u>*Do not routinely prescribe antibiotics due to the risk of serious adverse effects and the rising resistance to antimicrobial drugs)</u></i></p> <p><b>Antiviral therapy</b> (to be introduced no later than the 5<sup>th</sup> day of symptom onset): <b>favipiravir</b> tablets, 1,600 mg every 12 h on the first day, then 600 mg every 12 h for another 4 days (the drug is applied in patients with symptoms)</p> <p><b>Symptomatic treatment</b></p>                                                                                      |
| <p><b>FORM 2</b></p> <ol style="list-style-type: none"> <li>1. <b>Positive nasopharyngeal swab</b> (PCR for SARS-CoV-2, Ag test)</li> <li>2. <b>Mild clinical presentation</b></li> <li>3. <b>Patients without comorbidities</b> and with the mild form of the infection (hospitalized patients with <math>sO_2 &gt; 94\%</math> and <b>with signs of pneumonia on X-ray, but without signs of hypoxia at admission</b>)</li> </ol> | <ol style="list-style-type: none"> <li>1. <b>Covid centers:</b> general wards</li> <li>2. <b>General hospitals:</b> isolation units</li> </ol> <p>Increased monitoring measures</p> <p>Checking patient temperature, <math>sO_2</math> and respiration rate several times a day</p>                             | <p><b>Anticoagulant therapy:</b> low-molecular-weight heparin</p> <p><b>Antiviral therapy</b> (to be introduced no later than the 5<sup>th</sup> day of symptom onset): <b>favipiravir</b> tablets, 1,600 mg every 12 h on the first day, then 600 mg every 12 h for another 4 days</p> <p><b>Corticosteroid therapy</b></p> <p><b>Vitamin therapy:</b> alphacalcidol tablets (<b>Alpha D3</b>), 1x2 mcg, <b>vitamin C</b> 1x1 g</p> <p><b>Convalescent plasma:</b> (within 2 weeks of symptom onset and after consultation with an infectologist and transfusiologist, according to the score)</p> <p><i><u>Application of antibiotics only in likely or proven bacterial infection</u></i></p> |
| <p><b>FORM 3</b></p> <ol style="list-style-type: none"> <li>1. <b>Positive nasopharyngeal swab</b> (PCR for SARS-CoV-2, Ag test)</li> <li>2. <b>Moderate clinical presentation</b></li> <li>3. <b>Severe hypoxia</b> with necessary oxygen therapy (<math>sO_2 &lt; 90\%</math>), fever, multiple opacities on chest X-ray (or</li> </ol>                                                                                           | <ol style="list-style-type: none"> <li>1. <b>Covid centers:</b> semi-intensive care units</li> <li>2. <b>General hospitals:</b> isolation units with <b>constant</b> monitoring (<math>\leq 1h</math>) of intensive care specialist, anesthesiologist, infectologist or internal medicine specialist</li> </ol> | <p><b>Anticoagulant therapy:</b> low-molecular-weight heparin</p> <p><b>Vitamin therapy:</b> alphacalcidol tablets (<b>Alpha D3</b>), 1x2 mcg, <b>vitamin C</b> 1x1 g</p> <p><b>Oxygen therapy:</b> nasal catheter or mask <math>O_2</math> (10 – 15 l/minute)</p>                                                                                                                                                                                                                                                                                                                                                                                                                               |

|                                                                                                                                                                                                                                                                                                           |                                                                                                 |                                                                                                                                                                                                                                                                                                                                                                                                                                                                                                                                                                                                                                                                           |
|-----------------------------------------------------------------------------------------------------------------------------------------------------------------------------------------------------------------------------------------------------------------------------------------------------------|-------------------------------------------------------------------------------------------------|---------------------------------------------------------------------------------------------------------------------------------------------------------------------------------------------------------------------------------------------------------------------------------------------------------------------------------------------------------------------------------------------------------------------------------------------------------------------------------------------------------------------------------------------------------------------------------------------------------------------------------------------------------------------------|
| <p>characteristic changes in the lungs visible on CT)</p> <p>4. <b>Cytokine storm</b> (deterioration of general health status with ↑CRP, ↑fibrinogen, ↑D-dimer, ↑IL-6) (at least one parameter elevated)</p>                                                                                              | <p>3. <b><u>In case of further deterioration transportation to Covid intensive care</u></b></p> | <p><b><u>Antiviral therapy</u></b> (if less than 5 days have elapsed since symptom onset): <b>favipiravir</b> (as above) or <b>remdesivir</b> ampules 200 mg intravenously on the first day, then 100 mg IV/day for another 4 days</p> <p><b><u>(Corticosteroid therapy</u></b> and/or <b>tocilizumab</b> 8 mg/kg IV per dose. Two doses are administered (max 800 mg per dose)</p> <p><b><u>Antibiotic therapy:</u></b> in keeping with the guidelines for rational application of antibiotics</p> <p><b><u>Convalescent plasma:</u></b> (within 2 weeks of symptom onset and after consultation with an infectologist and transfusiologist, according to the score)</p> |
| <p><b><i>FORMS 4 and 5</i></b></p> <p>1. <b>Positive nasopharyngeal swab</b></p> <p>2. <b>Very severe/severe clinical presentation</b></p> <p>3. <b>Onset or development of ARDS</b></p> <p>4. <b>Cytokine storm</b> (deterioration of general health status with ↑CRP, ↑fibrinogen, ↑D-dimer, ↑IL-6)</p> | <p><b>Covid centers:</b> intensive care units</p>                                               | <p><b><u>All available measures/combinations of measures need to be applied</u></b></p> <p><b>Maintaining ↑ O<sub>2</sub> flow</b> as long as possible, <b>MV</b> in case of further deterioration</p> <p><b>Corticosteroid therapy:</b> methylprednisolone 1-2 mg/kg, 3-5 days, then gradual reducing of the dose (dose should be adjusted to body mass in order to reduce the risk of bleeding and other adverse effects)</p> <p><b>Tocilizumab:</b> 8 mg/kg IV per dose. Two doses (max 800 mg per dose)</p> <p><b>Immunoglobulins:</b> 10 – 20 g per day Ig over a period of 3 – 5 days</p>                                                                           |

# PROTOKOL ZA LEČENJE PACIJENATA SA KOVID-19 VERZIJA 11

| FORMA BOLESTI                                                                                                                                                                                                                                                                                                                                                                                                                                                                                   | USTANOVA                                                                                                                                                                                                                                                                                               | TERAPIJA                                                                                                                                                                                                                                                                                                                                                                                                                                                                                                                                                                                                                                                                                                                                                                      |
|-------------------------------------------------------------------------------------------------------------------------------------------------------------------------------------------------------------------------------------------------------------------------------------------------------------------------------------------------------------------------------------------------------------------------------------------------------------------------------------------------|--------------------------------------------------------------------------------------------------------------------------------------------------------------------------------------------------------------------------------------------------------------------------------------------------------|-------------------------------------------------------------------------------------------------------------------------------------------------------------------------------------------------------------------------------------------------------------------------------------------------------------------------------------------------------------------------------------------------------------------------------------------------------------------------------------------------------------------------------------------------------------------------------------------------------------------------------------------------------------------------------------------------------------------------------------------------------------------------------|
| <p><b>OBLIK 1</b></p> <ol style="list-style-type: none"> <li>1. Pozitivan nazofaringealni bris (PCR na SARS-KoV-2, Ag test)</li> <li>2. Asimptomatska</li> <li>3. Vrlo blaga klinička slika</li> <li>4. Bolesnici bez komorbiditeta i sa blagim oblikom infekcije (hospitalizovani pacijenti sa <math>sO_2 &gt; 94\%</math> i bez Rtg znakovapneumonije)</li> </ol>                                                                                                                             | <p>Kućno lečenje i izolacija uz kontrole i nadzor Kovid ambulanti</p>                                                                                                                                                                                                                                  | <p><b>Vitaminska th:</b> alfa-kalcidol tbl. (Alpha D<sub>3</sub>) 1x2 mcg, vitamin C 1x1g (ukoliko nema bubrežnih smetnji)</p> <p><b>* Ne davati antibiotike rutinski! Zbog rizika ozbiljnih neželjenih dejstava i rastuće rezistencije na antimikrobne lekove.</b></p> <p><b>Antivirusna th.</b> (započeti najkasnije do 5. dana od početka tegoba): Favipiravir tbl. 1600 mg na 12 h, prvi dan, zatim 600 mg na 12h još 4 dana (lek se primenjuje kod obolelih koji imaju simptome)</p> <p><b>Simptomatska th.</b></p>                                                                                                                                                                                                                                                      |
| <p><b>OBLIK 2</b></p> <ol style="list-style-type: none"> <li>1. Pozitivan nazofaringealni bris (PCR na SARS-KoV-2, Ag test)</li> <li>2. Blaga klinička slika</li> <li>3. Bolesnici bez komorbiditeta i sa blagim oblikom infekcije (hospitalizovani pacijenti sa <math>sO_2 &gt; 94\%</math> i sa Rtg znacima pneumonije sa ili bez znakova hipoksije pri prijemu)</li> </ol>                                                                                                                   | <ol style="list-style-type: none"> <li>1. Kovid centri: odelj. opšteg tipa</li> <li>2. Opšte bolnice: odelj. izolacije</li> </ol> <p>Mere pojačanog nadzora<br/>Više puta dnevno praćenje temperature, <math>sO_2</math> i fr. disanja</p>                                                             | <p><b>Antikoagulantna th:</b> Niskomolekulrni heparin</p> <p><b>Antivirusna th.</b> (započeti najkasnije do 5. dana od početka tegoba): Favipiravir tbl. 1600 mg na 12 h, prvi dan, zatim 600 mg na 12h još 4 dana</p> <p><b>Kortikosteroidna th.</b></p> <p><b>Vitaminska th:</b> alfa-kalcidol tbl. (Alpha D<sub>3</sub>) 1x2 mcg, vitamin C 1x1g</p> <p><b>Plazma rekonvalescenata</b> (unutar 2 nedelje od početka tegoba i nakon konsultacije sa infektologom i transfuziologom, prema skor)</p> <p><b>Primena antibiotika samo kod verovatne ili dokazane bakterijske inf.</b></p>                                                                                                                                                                                      |
| <p><b>OBLIK 3</b></p> <ol style="list-style-type: none"> <li>1. Pozitivan nazofaringealni bris (PCR na SARS-KoV-2, Ag test)</li> <li>2. Umereno teška klinička slika</li> <li>3. Teška hipoksija sa potrebom za oksigenu Th (<math>sO_2 &lt; 90\%</math>), febrilnost, multiple opacifikacije na Rtg-u pluća (ili specifične promene na plućima viđene na CT-u)</li> <li>4. Citokinska oluja (pogoršanje opšteg stanja uz ↑CRP, ↑fibrinogen, ↑D-dimer, ↑IL-6) (bar jednog parametra)</li> </ol> | <ol style="list-style-type: none"> <li>1. Kovid centri: odelj. poluintenzivne nege</li> <li>2. Opšte bolnice: odelj. izolacije sa stalnim nadzorom (≤1h) intenziviste, anesteziologa, infektologa ili interniste</li> <li>3. U slučaju daljeg pogoršanja: transport u Kovid intenzivne nege</li> </ol> | <p><b>Antikoagulantna th:</b> Niskomolekulrni heparin</p> <p><b>Vitaminska th:</b> alfa-kalcidol tbl. (Alpha D<sub>3</sub>) 1x2 mcg, vitamin C 1x1g</p> <p><b>Oksigenoterapija:</b> nazalni kateter ili maska (<math>O_2</math> 10-15 L/min)</p> <p><b>Antivirusna th.</b> (ako je prošlo manje od 5. dana od početka tegoba) Favipiravir (kao gore) ili Remdesivir ampi. 200 mg i.v. prvi dan, zatim 100 mg i.v./dan još 4 dana</p> <p><b>Kortikosteroidna th.</b> i/ili <b>tocilizumab</b> 8 mg/kg i.v. po dozi. Daju se 2 doze (max. 800mg/dози)</p> <p><b>Antibiotiska th:</b> prema vodiču za racionalnu primenu antibiotika, <b>Plazma rekonvalescenata</b> (unutar 2 nedelje od početka tegoba i nakon konsultacije sa infektologom i transfuziologom, prema skor)</p> |
| <p><b>OBLIK 4 i 5</b></p> <ol style="list-style-type: none"> <li>1. Pozitivan nazofaringealni bris</li> <li>2. Veoma teška/teška klinička slika</li> <li>3. Početak ili razvoj ARDS-a</li> <li>4. Citokinska oluja (pogoršanje opšteg stanja uz ↑CRP, ↑fibrinogen, ↑D-dimer, ↑IL-6)</li> </ol>                                                                                                                                                                                                  | <p>Kovid centri: intenzivna nega</p>                                                                                                                                                                                                                                                                   | <p>Primeniti sve dostupne mere/kombinacije intenzivnog lečenja</p> <ol style="list-style-type: none"> <li>1. Što duže održavanje na ↑ protoku <math>O_2</math>, MV u slučaju pogoršanja</li> <li>2. Kortikosteroidna th: Metilprednizolon 1-2 mg/kg, 3-5 dana, a zatim postupno redukovanje doze (dozu prilagoditi telesnoj masi da bi se smanjio rizik krvarenja i drugih neželjenih efekata)</li> <li>3. Tocilizumab: 8 mg/kg i.v. po dozi - 2 doze (max. 800 mg/dози)</li> <li>4. Imunoglobulni: 10-20 g/dan Ig tokom 3-5 dana</li> </ol>                                                                                                                                                                                                                                  |



## Supplementary Table S4 STROBE Statement

Checklist of items that should be included in reports of *cohort studies*

|                          | Item No | Recommendation                                                                                                                                                                       | Page No   |
|--------------------------|---------|--------------------------------------------------------------------------------------------------------------------------------------------------------------------------------------|-----------|
| Title and abstract       | 1       | (a) Indicate the study’s design with a commonly used term in the title or the abstract                                                                                               | 1,2       |
|                          |         | (b) Provide in the abstract an informative and balanced summary of what was done and what was found                                                                                  | 1         |
| Introduction             |         |                                                                                                                                                                                      |           |
| Background/rationale     | 2       | Explain the scientific background and rationale for the investigation being reported                                                                                                 | 1,2       |
| Objectives               | 3       | State specific objectives, including any prespecified hypotheses                                                                                                                     | 2         |
| Methods                  |         |                                                                                                                                                                                      |           |
| Study design             | 4       | Present key elements of study design early in the paper                                                                                                                              | 2         |
| Setting                  | 5       | Describe the setting, locations, and relevant dates, including periods of recruitment, exposure, follow-up, and data collection                                                      | 2, 12, 13 |
| Participants             | 6       | (a) Give the eligibility criteria, and the sources and methods of selection of participants. Describe methods of follow-up                                                           | 12, 13    |
|                          |         | (b) For matched studies, give matching criteria and number of exposed and unexposed                                                                                                  | N/A       |
| Variables                | 7       | Clearly define all outcomes, exposures, predictors, potential confounders, and effect modifiers. Give diagnostic criteria, if applicable                                             | 12, 13    |
| Data sources/measurement | 8*      | For each variable of interest, give sources of data and details of methods of assessment (measurement). Describe comparability of assessment methods if there is more than one group | 12, 13    |
| Bias                     | 9       | Describe any efforts to address potential sources of bias                                                                                                                            | 12, 13    |
| Study size               | 10      | Explain how the study size was arrived at                                                                                                                                            | N/A       |
| Quantitative variables   | 11      | Explain how quantitative variables were handled in the analyses. If applicable, describe which groupings were chosen and why                                                         | 13        |
| Statistical methods      | 12      | (a) Describe all statistical methods, including those used to control for confounding                                                                                                | 13        |
|                          |         | (b) Describe any methods used to examine subgroups and interactions                                                                                                                  | 13        |
|                          |         | (c) Explain how missing data were addressed                                                                                                                                          | 12        |

|                          |     |                                                                                                                                                                                                              |            |
|--------------------------|-----|--------------------------------------------------------------------------------------------------------------------------------------------------------------------------------------------------------------|------------|
|                          |     | (d) If applicable, explain how loss to follow-up was addressed                                                                                                                                               | N/A        |
|                          |     | (e) Describe any sensitivity analyses                                                                                                                                                                        | N/A        |
| <b>Results</b>           |     |                                                                                                                                                                                                              |            |
| Participants             | 13* | (a) Report numbers of individuals at each stage of study—eg numbers potentially eligible, examined for eligibility, confirmed eligible, included in the study, completing follow-up, and analysed            | 2          |
|                          |     | (b) Give reasons for non-participation at each stage                                                                                                                                                         | 2          |
|                          |     | (c) Consider use of a flow diagram                                                                                                                                                                           | N/A        |
| Descriptive data         | 14* | (a) Give characteristics of study participants (eg demographic, clinical, social) and information on exposures and potential confounders                                                                     | 2, 3       |
|                          |     | (b) Indicate number of participants with missing data for each variable of interest                                                                                                                          | 2,3        |
|                          |     | (c) Summarise follow-up time (eg, average and total amount)                                                                                                                                                  | 2, 3       |
| Outcome data             | 15* | Report numbers of outcome events or summary measures over time                                                                                                                                               | 2-9        |
| Main results             | 16  | (a) Give unadjusted estimates and, if applicable, confounder-adjusted estimates and their precision (eg, 95% confidence interval). Make clear which confounders were adjusted for and why they were included | N/A        |
|                          |     | (b) Report category boundaries when continuous variables were categorized                                                                                                                                    | 3-9        |
|                          |     | (c) If relevant, consider translating estimates of relative risk into absolute risk for a meaningful time period                                                                                             | N/A        |
| Other analyses           | 17  | Report other analyses done—eg analyses of subgroups and interactions, and sensitivity analyses                                                                                                               | 5-9        |
| <b>Discussion</b>        |     |                                                                                                                                                                                                              |            |
| Key results              | 18  | Summarise key results with reference to study objectives                                                                                                                                                     | 10, 11     |
| Limitations              | 19  | Discuss limitations of the study, taking into account sources of potential bias or imprecision. Discuss both direction and magnitude of any potential bias                                                   | 11, 12     |
| Interpretation           | 20  | Give a cautious overall interpretation of results considering objectives, limitations, multiplicity of analyses, results from similar studies, and other relevant evidence                                   | 10, 11, 12 |
| Generalisability         | 21  | Discuss the generalisability (external validity) of the study results                                                                                                                                        | 11, 12     |
| <b>Other information</b> |     |                                                                                                                                                                                                              |            |

---

|         |    |                                                                                                                                                               |    |
|---------|----|---------------------------------------------------------------------------------------------------------------------------------------------------------------|----|
| Funding | 22 | Give the source of funding and the role of the funders for the present study and, if applicable, for the original study on which the present article is based | 14 |
|---------|----|---------------------------------------------------------------------------------------------------------------------------------------------------------------|----|

---
